CORRECTION

# Correction: Batoid locomotion: effects of speed on pectoral fin deformation in the little skate, *Leucoraja erinacea*

Valentina Di Santo, Erin L. Blevins and George V. Lauder

There was an error in *J. Exp. Biol.* (2017) **220**, 705–712 (doi:10.1242/jeb.148767).

The units for wavespeed in Fig. 6B are incorrect: they should be  $\text{cm s}^{-1}$ . The corrected figure appears below, and both the online full-text and PDF versions of the article have been updated.

The authors apologise for any inconvenience.

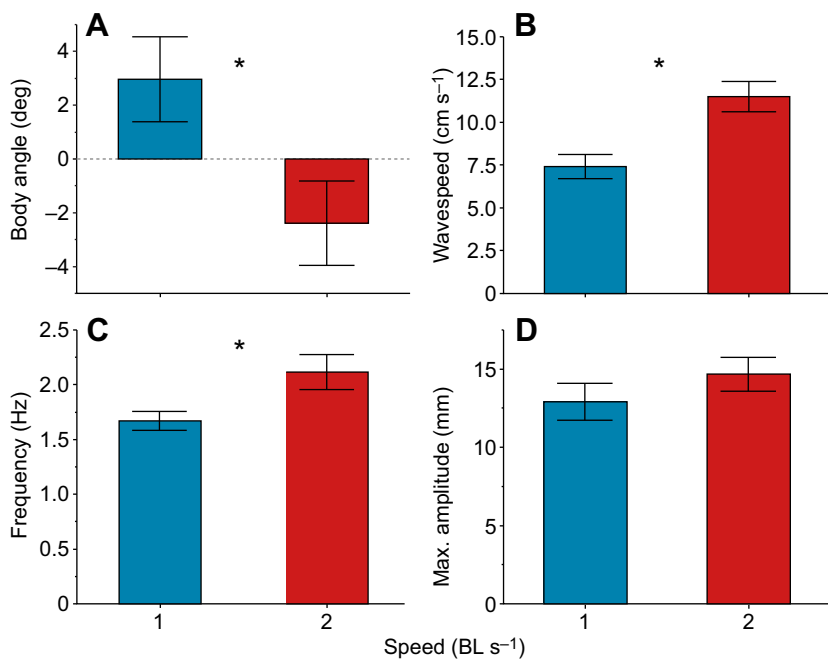

**Fig. 6 (corrected). Kinematic variables measured on the disc of little skates swimming at two speeds.** Mean values for (A) body angle (deg), (B) wavespeed ( $\text{cm s}^{-1}$ ), (C) frequency (Hz) and (D) maximum amplitude (mm) at two speeds, 1 and 2  $\text{BL s}^{-1}$  (blue and red, respectively). Asterisks indicate significant differences between tested speeds ( $n=3$  individuals; two-way ANOVA, followed by a Tukey–Kramer multiple comparisons test,  $\alpha=0.05$ ).

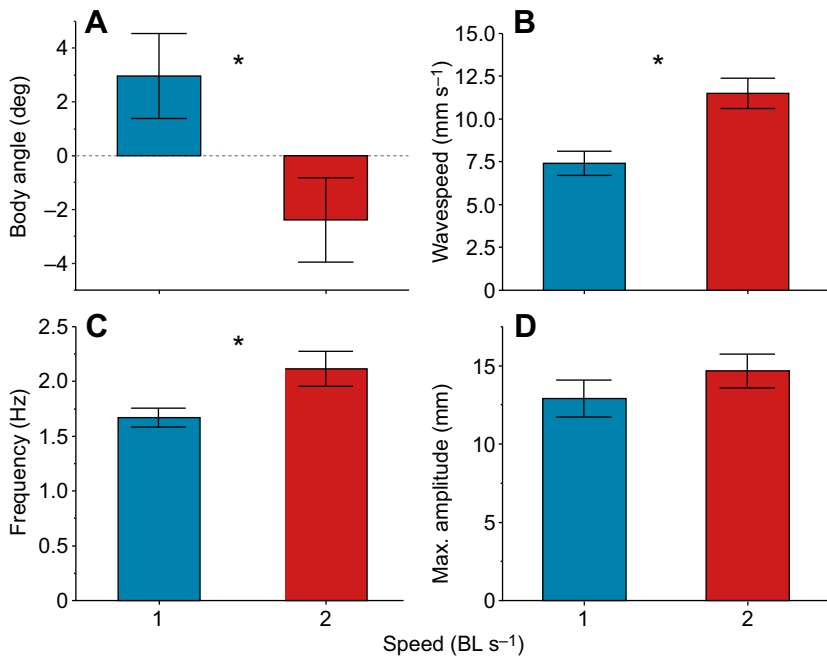

**Fig. 6 (original).** Kinematic variables measured on the disc of little skates swimming at two speeds. Mean values for (A) body angle (deg), (B) wavespeed ( $\text{mm s}^{-1}$ ), (C) frequency (Hz) and (D) maximum amplitude (mm) at two speeds, 1 and 2  $\text{BL s}^{-1}$  (blue and red, respectively). Asterisks indicate significant differences between tested speeds ( $n=3$  individuals; two-way ANOVA, followed by a Tukey–Kramer multiple comparisons test,  $\alpha=0.05$ ).
